# Supplementary material
Source: Springer Nature journal article supplement (https://www.springermedizin.de/resource/supplementary/12889_2012_5359_MOESM1_ESM.pdf/9495116)
Supplement: MOESM1 [file 9495116]

Recruitment from 97 workplaces

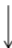

16 workplaces recruited

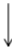

Workplace (cluster) randomisation

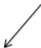

Eight allocated to  
intervention arm

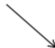

Eight allocated to  
control arm

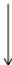

Recruitment within workplace  
(within-cluster recruitment)

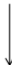

Recruitment within workplace  
(within-cluster recruitment)
